# Supplementary material for: Brain-Derived Estrogen Regulates Neurogenesis, Learning and Memory with Aging in Female Rats
Source: MDPI journal article supplement (doi:10.3390/biology12060760), 2023-05-23

WB

# Figure S1 FBN-ARO-KO Impaired Hippocampal Neurons and Cognitive Function.

Figure S1

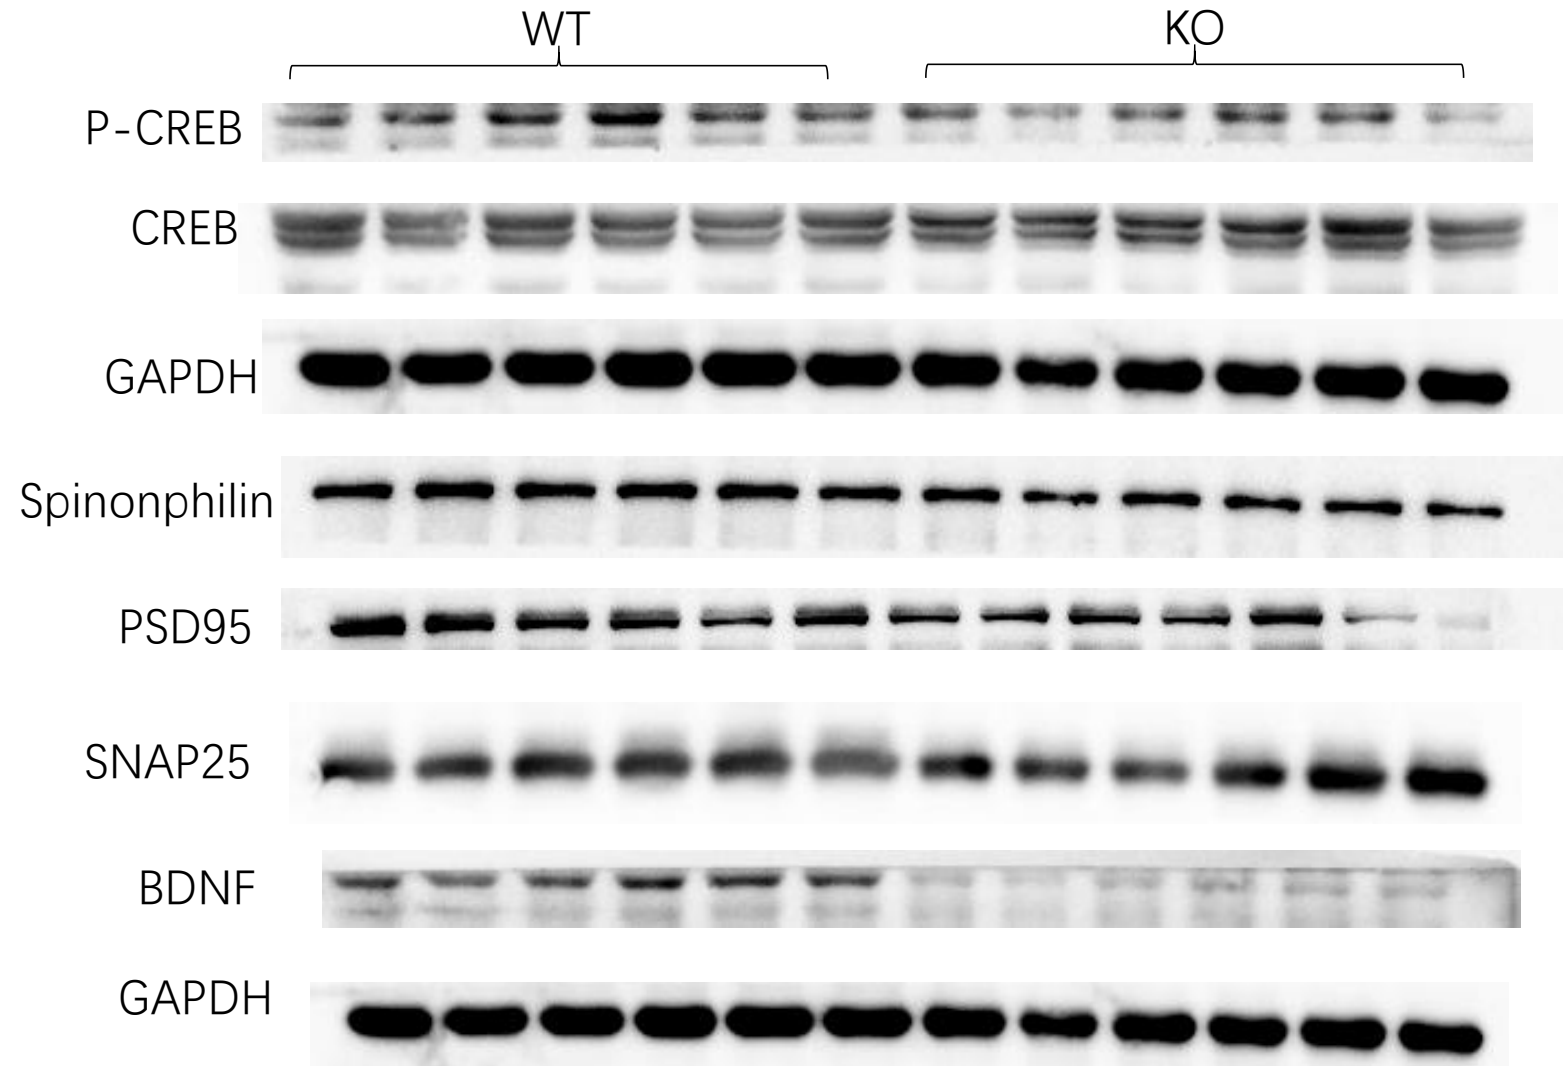

Figure S2 Letrozole Inhibited Neurogenesis and Neuroprotection in the Hippocampal DG Region of 1-Mon Female Rats.

Figure S2

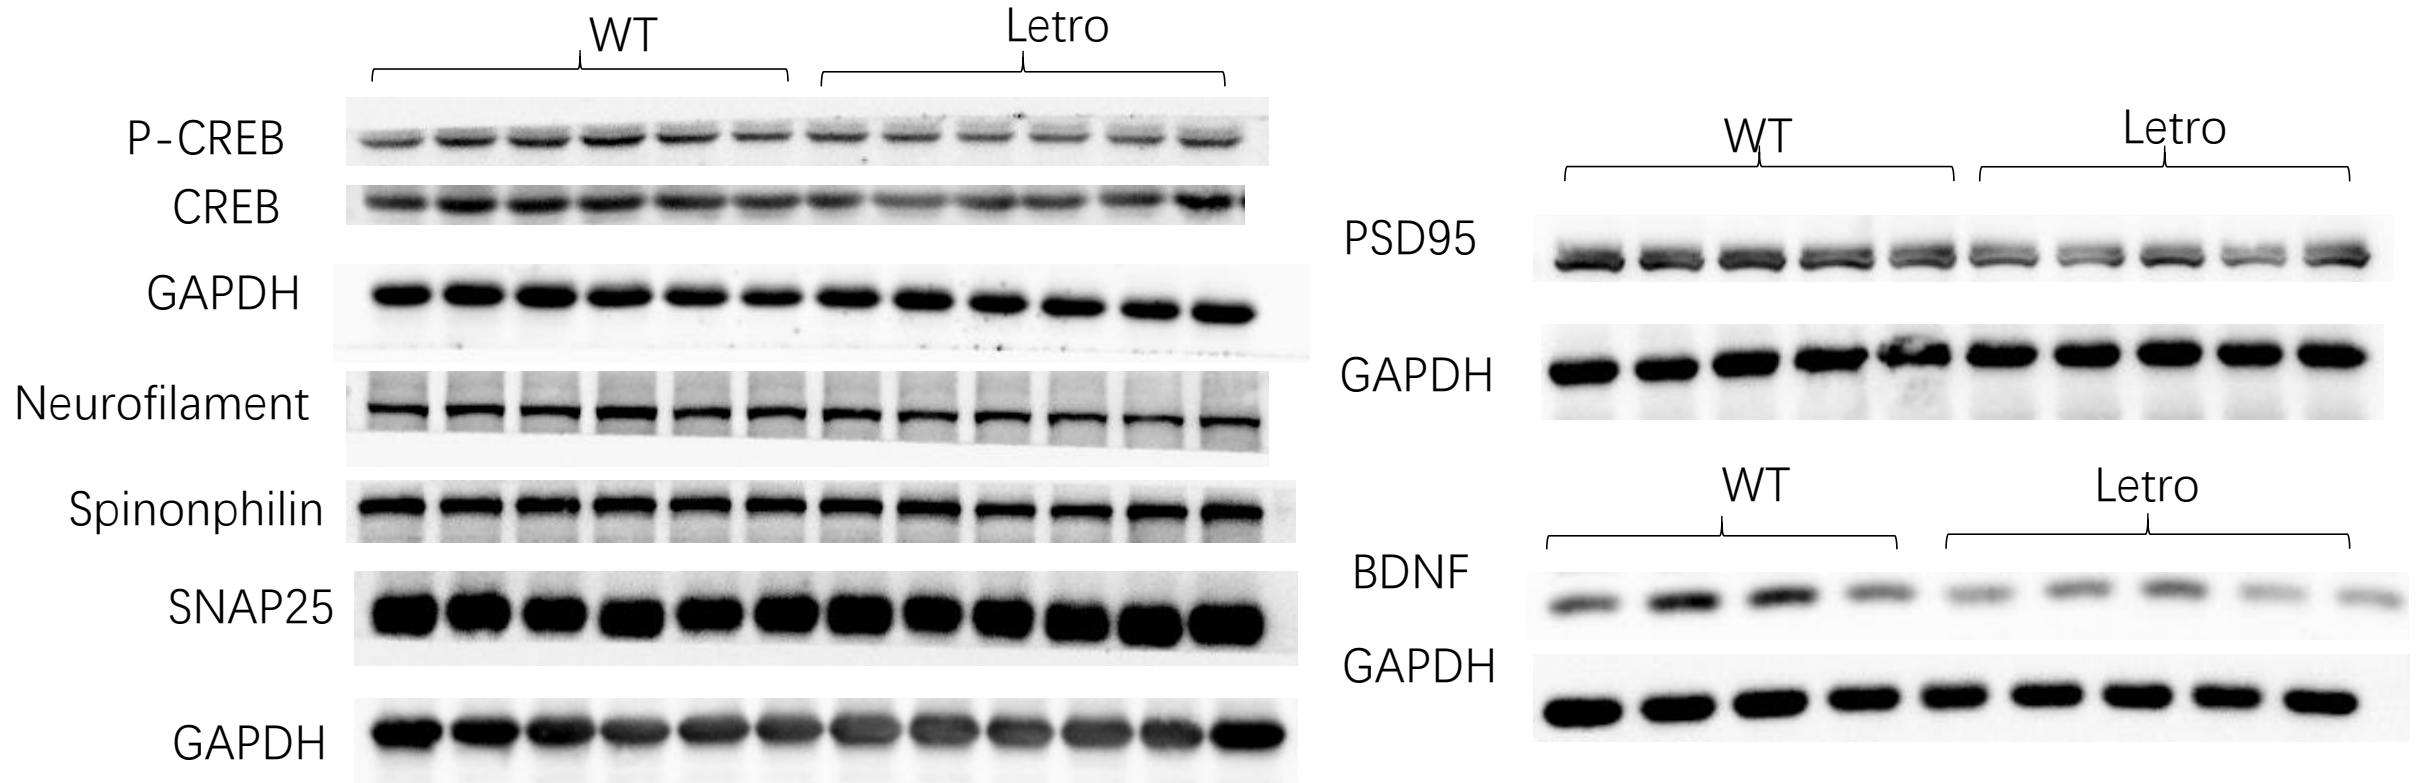

Supplement: s1 [file s1]
